# Supplementary material for: A facile synthesis of novel cyclodextrin derivatives incorporating one β-(1,4)-glucosidic bond and their unique inclusion ability
Source: Royal Society of Chemistry journal article supplement (doi:10.1039/b309261e), 2003-01-01
Supplement: b309261e.pdf [file b309261e.pdf]

## Electronic Supplementary Information (ESI)

### A facile synthesis of novel cyclodextrin derivatives incorporating one $\beta$ -(1,4)-glucosidic bond and their unique inclusion ability

Toshiyuki Kida, Akira Kikuzawa, Yohji Nakatsuji and Mitsuru Akashi\*

*Department of Molecular Chemistry, Graduate School of Engineering, Osaka*

*University, 2-1 Yamadaoka, Suita, Osaka 565-0871, Japan.*

*E-mail: akashi@chem.eng.osaka-u.ac.jp*

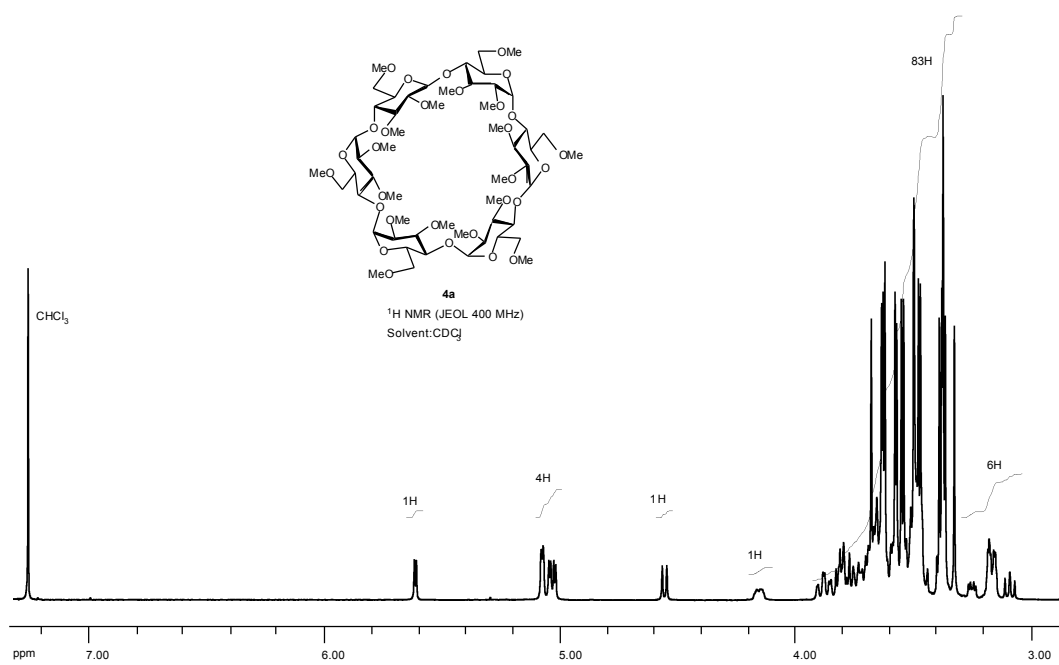

**Fig. 1** <sup>1</sup>H NMR spectrum of compound 4a.

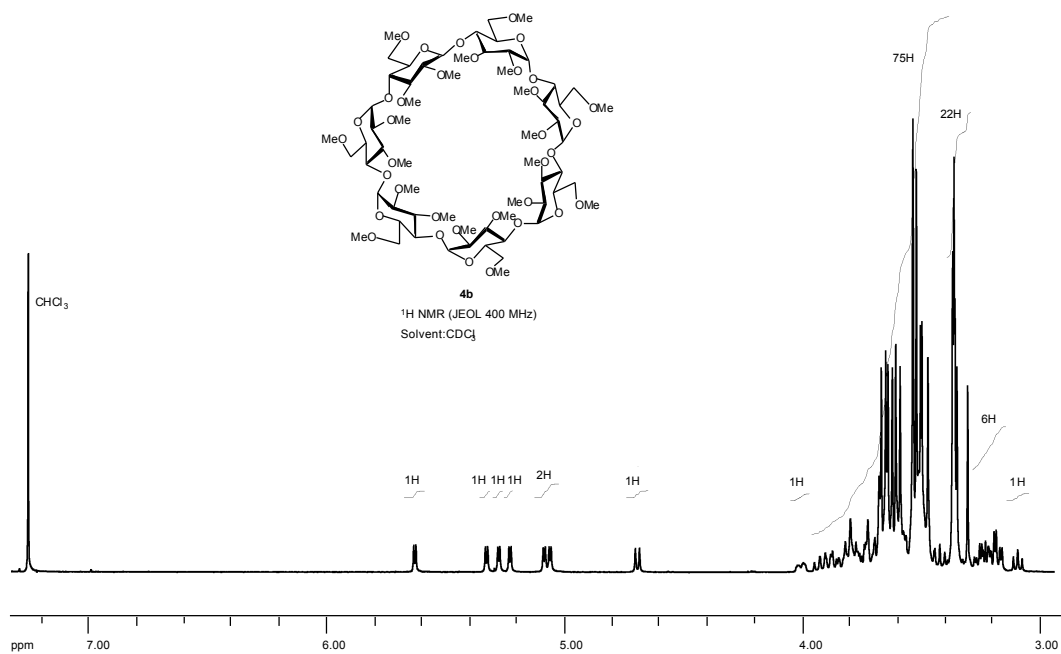

**Fig. 2** <sup>1</sup>H NMR spectrum of compound **4b**.

**Table 2.** NMR chemical shifts of the carbohydrate protons of **4a** and **4b** (400 MHz, CDCl<sub>3</sub>, 25 °C).

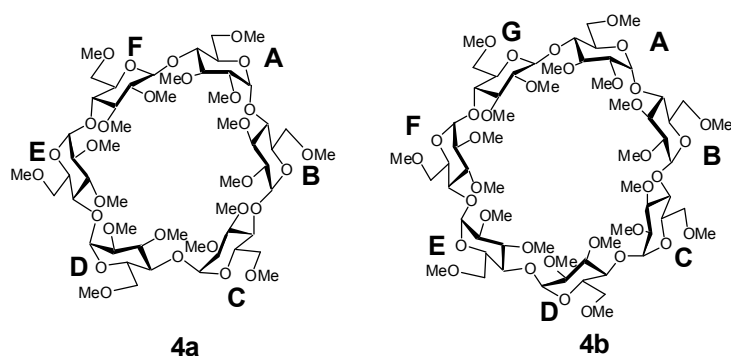

| residue   |   | $\delta$ (ppm) |      |      |      |      |      |      |
|-----------|---|----------------|------|------|------|------|------|------|
|           |   | H-1            | H-2  | H-3  | H-4  | H-5  | H-6a | H-6b |
| <b>4a</b> | A | 5.07           | 3.24 | 3.79 | 3.82 | 4.14 | 3.64 | 3.81 |
|           | B | 5.08           | 3.16 | 3.45 | 3.74 | 3.64 | 3.62 | 3.73 |
|           | C | 5.02           | 3.16 | 3.49 | 3.53 | 3.66 | 3.56 | 3.78 |
|           | D | 5.04           | 3.15 | 3.48 | 3.54 | 3.69 | 3.59 | 3.85 |
|           | E | 5.62           | 3.15 | 3.51 | 3.64 | 3.68 | 3.59 | 3.88 |
|           | F | 4.56           | 3.08 | 3.45 | 3.78 | 3.51 | 3.46 | 3.69 |
| <b>4b</b> | A | 5.28           | 3.26 | 3.80 | 4.00 | 3.62 | 3.52 | 3.79 |
|           | B | 5.33           | 3.23 | 3.52 | 3.70 | 3.81 | 3.85 | 3.58 |
|           | C | 5.06           | 3.20 | 3.57 | 3.67 | 3.78 | 3.49 | 3.66 |
|           | D | 5.23           | 3.18 | 3.51 | 3.61 | 3.89 | 3.58 | 3.75 |
|           | E | 5.09           | 3.17 | 3.46 | 3.59 | 3.66 | 3.65 | 3.88 |
|           | F | 5.63           | 3.22 | 3.48 | 3.68 | 3.72 | 3.63 | 3.79 |
|           | G | 4.69           | 3.09 | 3.42 | 3.93 | 3.50 | 3.48 | 3.69 |

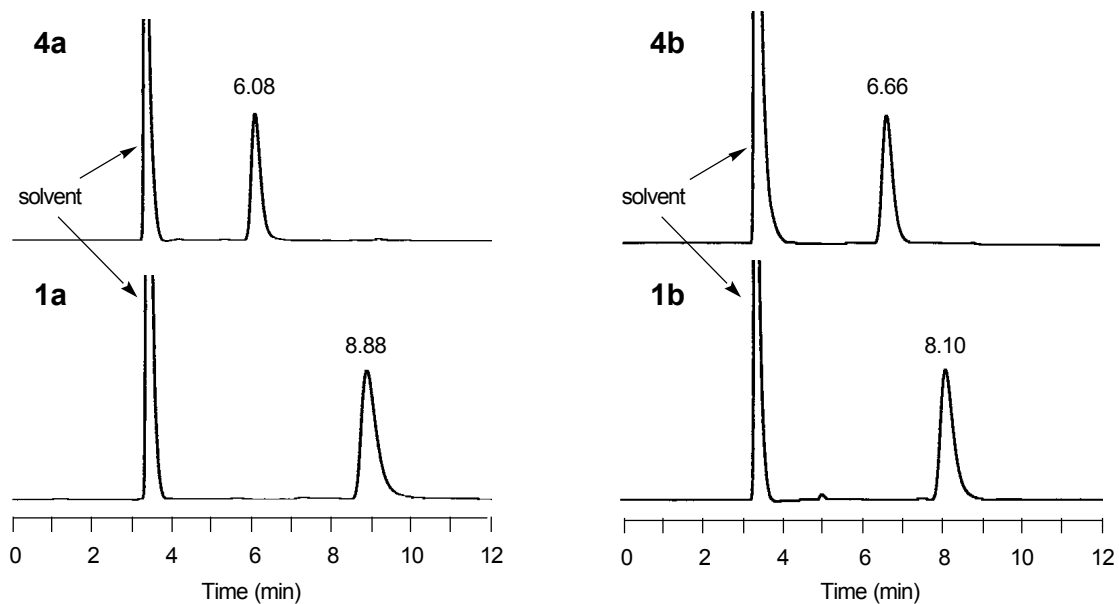

**Fig. 3** HPLC chromatograms of **4a**, **4b**, permethylated  $\alpha$ -CD (**1a**) and permethylated  $\beta$ -CD (**1b**). Column: Wakopak Navi C30-5 (4.6 mm x 250 mm); mobile phase:  $\text{CH}_3\text{CN}$ ; flow rate: 1.0 mL/min; temperature: 25 °C; detector: RI.
